# Supplementary material for: DSM-5 Field Trials in the United States and Canada, Part III: Development and Reliability Testing of a Cross-Cutting Symptom Assessment for DSM-5
Source: Atypon-hosted journal article supplement (doi:10.1176/appi.ajp.2012.12071000), 2013-01-01
Supplement: 71_ds001.pdf [file 71_ds001.pdf]

**Supplemental Table A. Pooled Means on the Adult Self-Rated Level 1 Cross-Cutting Measures**

| Level 1 item                     | Range of Scores | Mean Score (SD) |
|----------------------------------|-----------------|-----------------|
| Depression 1                     | 0-4             | 1.98 (0.38)     |
| Depression 2                     | 0-4             | 2.09 (0.30)     |
| Anger                            | 0-4             | 1.86 (0.34)     |
| Mania 1                          | 0-4             | 1.29 (0.41)     |
| Mania 2                          | 0-4             | 0.83 (0.35)     |
| Anxiety 1                        | 0-4             | 2.21 (0.35)     |
| Anxiety 2                        | 0-4             | 1.46 (0.34)     |
| Anxiety 3                        | 0-4             | 1.85 (0.37)     |
| Somatic Distress 1               | 0-4             | 1.61 (0.38)     |
| Somatic Distress 2               | 0-4             | 1.25 (0.36)     |
| Suicide                          | 0-4             | 0.65 (0.25)     |
| Psychosis 1                      | 0-4             | 0.55 (0.23)     |
| Psychosis 2                      | 0-4             | 0.41 (0.23)     |
| Sleep                            | 0-4             | 2.08 (0.35)     |
| Memory                           | 0-4             | 1.54 (0.35)     |
| Repetitive Thoughts              | 0-4             | 1.51 (0.37)     |
| Repetitive Behaviors             | 0-4             | 0.98 (0.34)     |
| Dissociation                     | 0-4             | 1.05 (0.33)     |
| Personality 1                    | 0-4             | 1.51 (0.38)     |
| Personality 2                    | 0-4             | 1.86 (0.37)     |
| Substance Use 1—Alcohol          | 0-4             | 0.34 (0.21)     |
| Substance Use 2—Tobacco          | 0-4             | 1.15 (0.21)     |
| Substance Use 3—Other Substances | 0-4             | 0.35 (0.23)     |

**Supplemental Table B. Pooled Means on the Parent- and Child-Rated Level 1 Cross-Cutting Measures**

| Level 1 Item           | Range of Scores | Mean Score (SD)            |                           |                          |
|------------------------|-----------------|----------------------------|---------------------------|--------------------------|
|                        |                 | Parent of Child < 11 years | Parent of Child 11+ years | Child 11+ years          |
| Depression 1           | 0-4             | 1.04 (0.35)                | 1.19 (0.34)               | 1.20 (0.34)              |
| Depression 2           | 0-4             | 0.93 (0.27)                | 1.33 (0.31)               | 1.10 (0.31)              |
| Irritability           | 0-4             | 1.77 (0.36)                | 1.79 (0.32)               | 1.48 (0.37)              |
| Anger                  | 0-4             | 2.18 (0.32)                | 1.80 (0.31)               | 1.28 (0.34)              |
| Mania 1                | 0-4             | 0.72 (0.31)                | 0.62 (0.28)               | 0.67 (0.33) <sup>b</sup> |
| Mania 2                | 0-4             | 0.89 (0.34)                | 0.63 (0.30)               | 1.06 (0.44)              |
| Anxiety 1              | 0-4             | 1.51 (0.32)                | 1.33 (0.37)               | 1.28 (0.32)              |
| Anxiety 2              | 0-4             | 1.18 (0.35)                | 1.22 (0.36)               | 1.09 (0.34)              |
| Anxiety 3              | 0-4             | 0.85 (0.35)                | 0.80 (0.33)               | 0.76 (0.34)              |
| Somatic Distress 1     | 0-4             | 1.11 (0.26)                | 1.44 (0.30)               | 1.28 (0.30)              |
| Somatic Distress 2     | 0-4             | 0.65 (0.25)                | 0.85 (0.27)               | 0.78 (0.30)              |
| Psychosis 1            | 0-4             | 0.16 (0.13)                | 0.18 (0.14)               | 0.32 (0.23) <sup>b</sup> |
| Psychosis 2            | 0-4             | 0.14 (0.14)                | 0.16 (0.16)               | 0.30 (0.25)              |
| Sleep                  | 0-4             | 1.76 (0.38)                | 1.71 (0.31)               | 1.52 (0.40)              |
| Attention              | 0-4             | 2.52 (0.37)                | 2.20 (0.34)               | 1.66 (0.40) <sup>b</sup> |
| Repetitive Thoughts 1  | 0-4             | 0.51 (0.28)                | 0.35 (0.22)               | 0.59 (0.32)              |
| Repetitive Behaviors 1 | 0-4             | 0.38 (0.20)                | 0.40 (0.22)               | 0.76 (0.31)              |

|                               |                 |                          |             |             |
|-------------------------------|-----------------|--------------------------|-------------|-------------|
| Repetitive Thoughts 2         | 0-4             | 0.42 (0.23)              | 0.37 (0.21) | 0.46 (0.20) |
| Repetitive Behaviors 2        | 0-4             | 0.31 (0.19)              | 0.27 (0.23) | 0.55 (0.28) |
| Substance Use 1—Alcohol       | 0-2 (P) 0-1 (C) | a                        | 0.11 (0.10) | —           |
| Substance Use 2—Tobacco       | 0-2 (P) 0-1 (C) | a                        | 0.14 (0.07) | —           |
| Substance Use 3—Illegal Drugs | 0-2 (P) 0-1 (C) | a                        | 0.09 (0.10) | —           |
| Substance Use 4—Legal Drugs   | 0-2 (P) 0-1 (C) | 0.01 (0.07) <sup>a</sup> | 0.04 (0.07) | —           |
| Suicide 1                     | 0-2 (P) 0-1 (C) | 0.20 (0.16)              | 0.18 (0.12) | —           |
| Suicide 2                     | 0-2 (P) 0-1 (C) | 0.12 (0.07) <sup>b</sup> | 0.25 (0.12) | —           |

<sup>a</sup> Summary statistics could not be computed for these items at the following sites because all responses were identical within the site:

Baystate: Parent respondents (child <11): Substance Use 1, Substance Use 2, Substance Use 3

Colorado: Parent respondents (child <11): Substance Use 1, Substance Use 2, Substance Use 3

Columbia: Parent respondents (child <11): Substance Use 1, Substance Use 2, Substance Use 4

Stanford: Parent respondents (child <11): Substance Use 1, Substance Use 2, Substance Use 4, Suicide 2

<sup>b</sup> Summary statistics were not included in the pooled estimates for these items at the following sites because standard errors for the ICC estimates were greater than 0.1:

Columbia: Parent respondents (child <11): Substance Use 3

Stanford: Parent respondents (child <11): Substance Use 3

Baystate: Child respondents Mania 1

Columbia: Child respondents Psychosis 1 and Attention

- Mean score and standard deviation are not provided since responses are Yes/No

### Supplemental Table C. Pooled Means on the Adult Self-Rated Combined Level 1 and Level 2 Cross-Cutting Measures

| Cross-Cutting Domain              | Range of Scores | Mean Score (SD) |
|-----------------------------------|-----------------|-----------------|
| Depression                        | 0-6             | 3.27 (0.43)     |
| Anger                             | 0-6             | 2.56 (0.52)     |
| Mania                             | 0-6             | 1.43 (0.44)     |
| Anxiety                           | 0-6             | 3.21 (0.42)     |
| Somatic Distress                  | 0-6             | 2.35 (0.47)     |
| Sleep                             | 0-6             | 3.12 (0.52)     |
| Repetitive Thoughts and Behaviors | 0-6             | 1.26 (0.33)     |
| Substance Use—Other Substances    | 0-5             | 0.29 (0.26)     |

### Supplemental Table D. Pooled Means on the Parent- and Child-Rated Combined Level 1 and Level 2 Cross-Cutting Measures

| Cross-Cutting Domain | Range of Scores | Mean Score (SD)           |                           |                 |
|----------------------|-----------------|---------------------------|---------------------------|-----------------|
|                      |                 | Parent of Child <11 years | Parent of Child 11+ years | Child 11+ years |
| Depression           | 0-6             | 1.70 (0.43)               | 2.02 (0.45)               | 1.96 (0.43)     |
| Anger                | 0-6             | 3.04 (0.46)               | 2.68 (0.43)               | 2.34 (0.52)     |
| Irritability         | 0-6 (P)         | 2.50 (0.30)               | 2.17 (0.30)               | 1.73 (0.35)     |
|                      | 0-4 (C)         |                           |                           |                 |
| Mania                | 0-6             | 1.34 (0.41)               | 1.04 (0.37)               | 1.45 (0.50)     |
| Anxiety              | 0-6             | 2.15 (0.41)               | 1.92 (0.42)               | 1.87 (0.44)     |
| Somatic Symptoms     | 0-6             | 1.42 (0.32)               | 1.85 (0.36)               | 1.85 (0.42)     |
| Sleep                | 0-6             | 2.29 (0.49)               | 2.37 (0.43)               | 2.08 (0.57)     |
| Inattentiveness      | 0-5 (P)         | 3.31 (0.46)               | 2.89 (0.45)               | —               |

|                                          |         |                          |                            |                          |
|------------------------------------------|---------|--------------------------|----------------------------|--------------------------|
| <b>Repetitive Thoughts and Behaviors</b> | 0-6 (C) | –                        | –                          | 1.48 (0.44)              |
| <b>Substance Use 1—Alcohol</b>           | 0-5     | a                        | 0.04 (0.05) <sup>b</sup>   | 0.16 (0.12)              |
| <b>Substance Use 2—Tobacco</b>           | 0-5     | a                        | 0.15 (0.13) <sup>a</sup>   | 0.26 (0.11)              |
| <b>Substance Use 3—Illegal Drug Use</b>  | 0-5     | a,b                      | 0.03 (0.06) <sup>a,b</sup> | 0.12 (0.09)              |
| <b>Substance Use 4—Legal Drug Use</b>    | 0-5     | 0.01 (0.03) <sup>a</sup> | 0.01 (0.03) <sup>a,b</sup> | 0.05 (0.10) <sup>a</sup> |
| <b>Suicidal Ideation</b>                 | 0-2 (P) | 0.11 (0.11)              | 0.11 (0.09) <sup>a</sup>   | 0.27 (0.29)              |
|                                          | 0-8 (C) |                          |                            |                          |
| <b>Suicide Attempt</b>                   | 0-3     | 0.08 (0.07) <sup>a</sup> | 0.15 (0.08)                | 0.29 (0.10)              |

–indicates that the item was not assessed in that patient group

<sup>a</sup> Summary statistics could not be computed for these items at the following sites because all response were identical within the site:

Baystate: Parent respondents (child <11): Substance Use 1, Substance Use 2, Substance Use 3

Colorado: Parent respondents (child <11): Substance Use 1, Substance Use 2, Substance Use 3

Columbia: Child respondents: Substance Use 4

Parent respondents (child <11): Substance Use 1, Substance Use 2, Substance Use 4

Parent respondents (child 11+): Substance Use 2, Substance Use 4, Suicide Ideation

Stanford: Parent respondents (child <11): Substance Use 1, Substance Use 2, Substance Use 4, Suicide Attempt

Parent respondents (child 11+): Substance Use 3

<sup>b</sup> Summary statistics were not included in the pooled estimates for these items at the following sites because standard errors for the ICC estimates were greater than 0.1:

Baystate: Parent respondents (child 11+): Substance Use 3, Substance Use 4

Columbia: Parent respondents (child <11): Substance Use 3

Parent respondents (child 11+): Substance Use 1, Substance Use 3

Stanford: Parent respondents (child <11): Substance Use 3

### Supplemental Table E. Pooled Means on the Clinician-Rated Cross-Cutting Measures for Adults and Children

| Cross-Cutting Domain | Range of Scores | Mean Score (SD) |                          |
|----------------------|-----------------|-----------------|--------------------------|
|                      |                 | Adult Patient   | Child Patient            |
|                      |                 | 18+ years       | 6-17 years               |
| Suicide              | 0-4             | 0.72 (0.27)     | 0.42 (0.25)              |
| Psychosis            | 0-4             | 0.56 (0.25)     | 0.06 (0.10) <sup>a</sup> |

<sup>a</sup> Summary statistics were not included in the pooled estimates for the psychosis rating at Stanford, Columbia and Colorado because standard errors for the ICC estimates were greater than 0.1.
